# Supplementary material for: In vivo affinity and target engagement in skin and blood in a first‐time‐in‐human study of an anti‐oncostatin M monoclonal antibody
Source: PubMed Central journal article supplement — Br J Clin Pharmacol. 2018 Jul 12;84(10):2280–91. doi: 10.1111/bcp.13669 (PMC6138480; doi:10.1111/bcp.13669), 2018-07-12
Supplement: BCP-84-2280-s001.pdf [file BCP-84-2280-s001.pdf]

**Supplementary Table 1. Overview of platelet counts (all-subjects population)**

|                                                       | Placebo        | GSK2330811              |                         |                       |                       |                       |
|-------------------------------------------------------|----------------|-------------------------|-------------------------|-----------------------|-----------------------|-----------------------|
|                                                       |                | 0.1 mg kg <sup>-1</sup> | 0.3 mg kg <sup>-1</sup> | 1 mg kg <sup>-1</sup> | 3 mg kg <sup>-1</sup> | 6 mg kg <sup>-1</sup> |
|                                                       | N=10           | N=6                     | N=6                     | N=6                   | N=6                   | N=6                   |
| <b>Maximum CTCAE grade, n (%)</b>                     |                |                         |                         |                       |                       |                       |
| Grade 1 (75–150 GI L <sup>-1</sup> )                  | 0 (0)          | 0 (0)                   | 1 (17)                  | 2 (33)                | 5 (83)                | 5 (83)                |
| Grade 2 (50–<75 GI L <sup>-1</sup> )                  | 0 (0)          | 0 (0)                   | 0 (0)                   | 0 (0)                 | 0 (0)                 | 1 (17)                |
| <b>Nadir, mean, (95% CI)</b>                          | 203.3          | 191.2                   | 188.5                   | 159.2                 | 145.0                 | 108.3                 |
|                                                       | (181.2, 225.4) | (165.8, 216.5)          | (147.0, 230.0)          | (128.6, 189.8)        | (107.1, 182.9)        | (84.1, 132.5)         |
| <b>% change from baseline of nadir, mean (95% CI)</b> | -9.3           | -7.6                    | -8.5                    | -24.8                 | -39.7                 | -54.6                 |
|                                                       | (-14.0, -4.7)  | (-12.2, -2.9)           | (-20.5, 3.5)            | (-31.2, -18.4)        | (-46.0, -33.4)        | (-65.0, -44.3)        |
| <b>Median days to nadir (min, max)<sup>a</sup></b>    | 41.0 (2, 83)   | 9.0 (1, 83)             | 23.5 (9, 55)            | 20.0 (13, 26)         | 26.0 (13, 27)         | 20.0 (17, 28)         |

<sup>a</sup>Days to platelet count nadir calculated as study day of nadir – 1

CI, confidence interval; CTCAE, Common Terminology Criteria for Adverse Events; GI L<sup>-1</sup>, 10<sup>9</sup> cells/litre
