# Supplementary material for: In vivo affinity and target engagement in skin and blood in a first‐time‐in‐human study of an anti‐oncostatin M monoclonal antibody
Source: PubMed Central journal article supplement — Br J Clin Pharmacol. 2018 Jul 12;84(10):2280–91. doi: 10.1111/bcp.13669 (PMC6138480; doi:10.1111/bcp.13669), 2018-07-12
Supplement: BCP-84-2280-s003.pdf [file BCP-84-2280-s003.pdf]

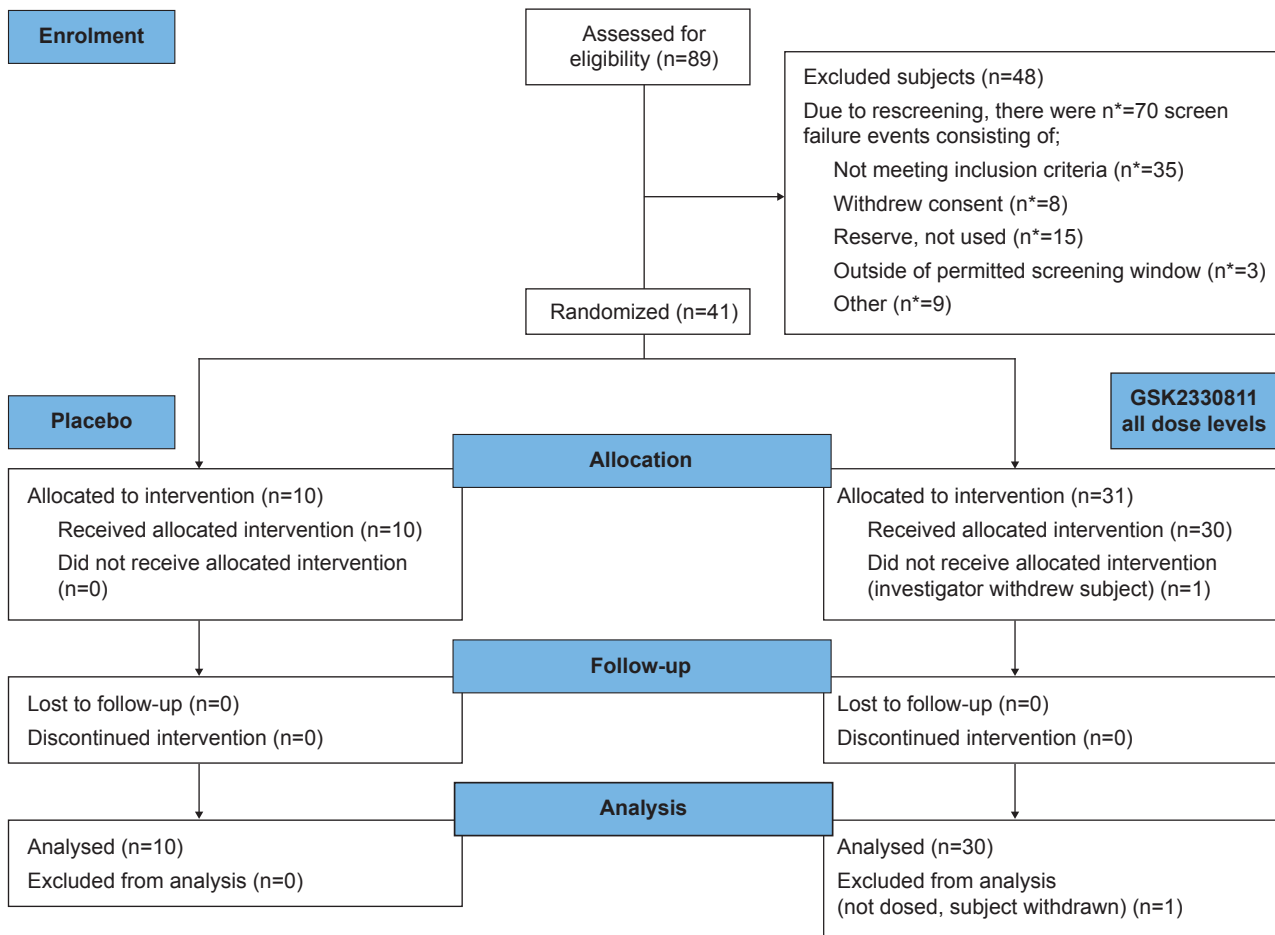

n\*=number of screen failure events (subjects failing screening could be rescreened, therefore n\* [screen failure events] exceeds n [subjects]. Subjects were only randomized once).
