# Supplementary figures and images for: In vivo affinity and target engagement in skin and blood in a first‐time‐in‐human study of an anti‐oncostatin M monoclonal antibody
Source: PubMed Central journal article supplement — Br J Clin Pharmacol. 2018 Jul 12;84(10):2280–91. doi: 10.1111/bcp.13669 (PMC6138480; doi:10.1111/bcp.13669), 2018-07-12

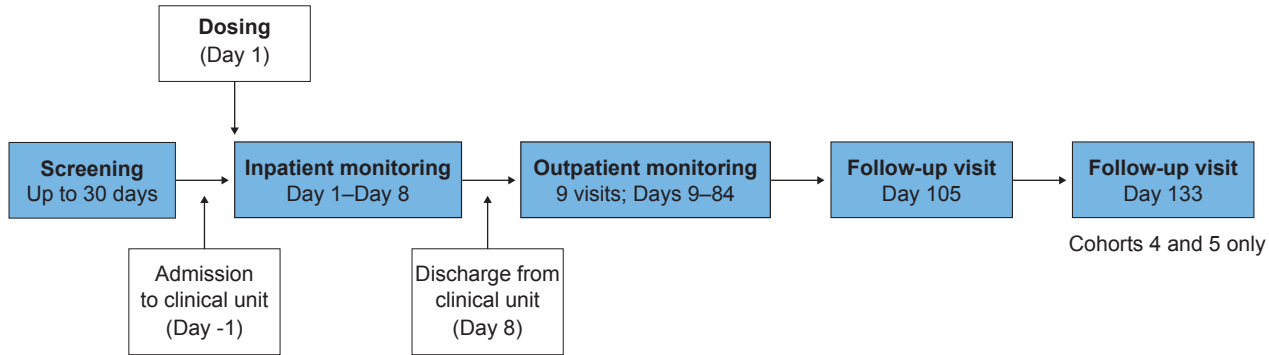

Supplement: BCP-84-2280-s002.pdf [file BCP-84-2280-s002.pdf]

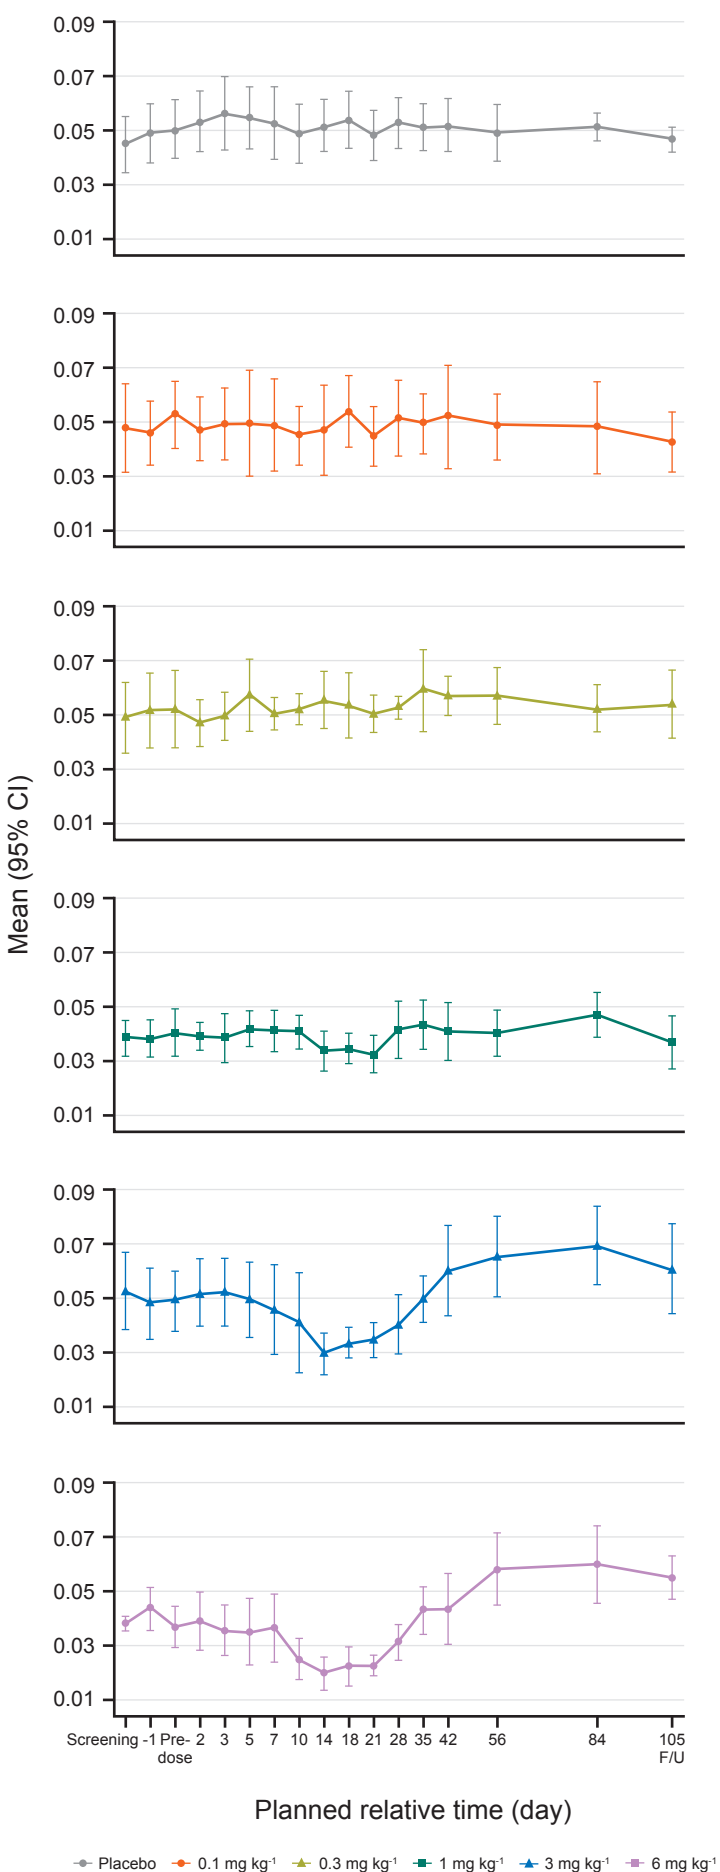

CI, confidence interval.

Supplement: BCP-84-2280-s004.pdf [file BCP-84-2280-s004.pdf]

**A**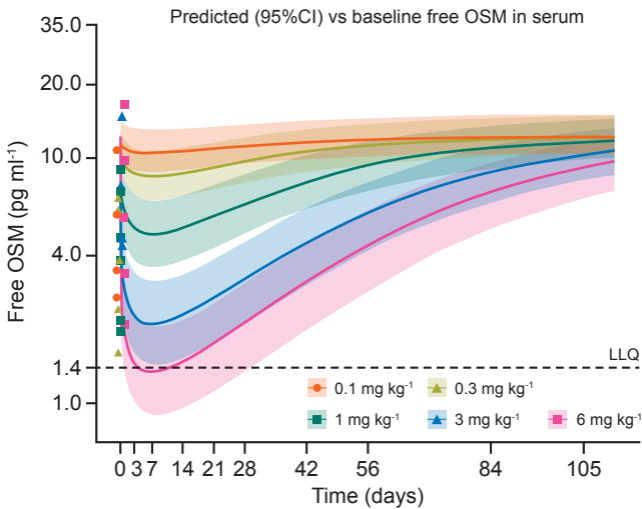**B**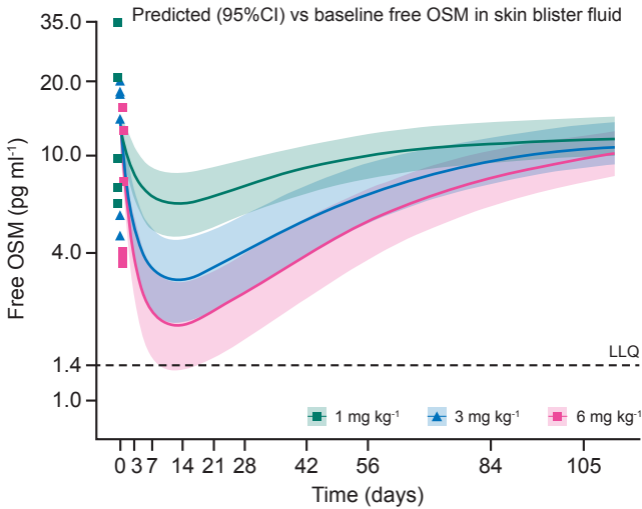

Supplement: BCP-84-2280-s005.pdf [file BCP-84-2280-s005.pdf]
